# Supplementary material
Source: HighWire-hosted journal article supplement (https://bmjopen.bmj.com/content/10/5/e037968)
Supplement: inline-supplementary-material-3 [file inline-supplementary-material-3.pdf]

# Hidden Histories

UNCOVERING THE LIFE HISTORIES OF LATE-DIAGNOSED AUTISTIC ADULTS

## SESSION 1

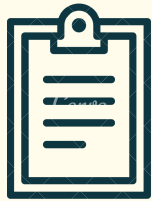

**25-30 MINS**  
**GETTING TO**  
**KNOW YOU**

- give details about what is involved
- get your consent to take part
- talk about how we can support you through the process
- answer some questions about your background

## SESSION 2

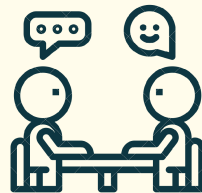

**1-2 HOURS**  
**THE MAIN**  
**INTERVIEW**

- ask you questions about your life both before and after your autism diagnosis
- possibly share personal objects or photos that are important to you
- held face-to-face or online

## SESSION 3

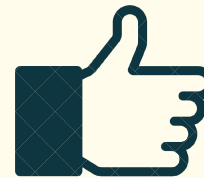

**25-30 MINS**  
**FINALISING**  
**YOUR**  
**INTERVIEW**

- check and sign-off your typed-up interview
- re-check your consent to take part
- re-check how you would like your interview to be made available

## SESSION 4

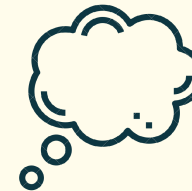

**15 MINS**  
**FOLLOW-UP**  
**QUESTIONS**

- ask you questions about how you felt telling your life history
