# Supplementary material
Source: HighWire-hosted journal article supplement (https://bmjopen.bmj.com/content/10/5/e037968)
Supplement: inline-supplementary-material-4 [file inline-supplementary-material-4.pdf]

# Life History Background Questionnaire

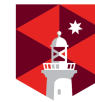

**MACQUARIE**  
University

Today's date (dd/mm/yyyy): / /  Participant ID:

The purpose of this questionnaire is to collect consistent background information from people taking part in the 'Hidden Histories of Late-Diagnosed Autistic Adults' project.

| A. General information about you       |                                                                                                     |
|----------------------------------------|-----------------------------------------------------------------------------------------------------|
| Date of birth (dd/mm/yyyy)             | <input type="text"/> / <input type="text"/> / <input type="text"/>                                  |
| Biological sex                         | <input type="text"/><br>Prefer not to say <input type="checkbox"/>                                  |
| Gender identity                        | <input type="text"/><br>Prefer not to say <input type="checkbox"/>                                  |
| Pronouns that you would like us to use | <input type="checkbox"/> he/him <input type="checkbox"/> she/her <input type="checkbox"/> they/them |

| B. About your household                                                                      |                                                                                                                                                                                                                                                                                                                                                                                      |
|----------------------------------------------------------------------------------------------|--------------------------------------------------------------------------------------------------------------------------------------------------------------------------------------------------------------------------------------------------------------------------------------------------------------------------------------------------------------------------------------|
| Who do you live with now?                                                                    | <input type="checkbox"/> With a spouse/partner <input type="checkbox"/> With other relatives<br><input type="checkbox"/> Alone <input type="checkbox"/> With friends/housemates<br><input type="checkbox"/> With parents <input type="checkbox"/> Other: <input type="text"/>                                                                                                        |
| How many people live in your household (including you)?                                      | <input type="text"/>                                                                                                                                                                                                                                                                                                                                                                 |
| How many children do you have? If none, please write 0                                       | <input type="text"/> If you have children, how many of them have a formal diagnosis of autism? <input type="text"/>                                                                                                                                                                                                                                                                  |
| What is your current postcode?                                                               | <input type="text"/>                                                                                                                                                                                                                                                                                                                                                                 |
| Do you speak a language <u>other than</u> English at home?                                   | <input type="checkbox"/> No, English only <input type="checkbox"/> Yes, Cantonese <input type="checkbox"/> Other: <input type="text"/><br><input type="checkbox"/> Yes, Greek <input type="checkbox"/> Yes, Arabic<br><input type="checkbox"/> Yes, Spanish <input type="checkbox"/> Yes, Italian<br><input type="checkbox"/> Yes, Mandarin <input type="checkbox"/> Yes, Vietnamese |
| <i>If more than one language other than English, tick the one that is spoken most often.</i> |                                                                                                                                                                                                                                                                                                                                                                                      |

### C. About your family's background

In which country were you born? \_\_\_\_\_

In which Australian state did you spend most of your time growing up? \_\_\_\_\_

What was the postcode (if known)? \_\_\_\_\_

In which country was your mother born? \_\_\_\_\_

Which of the following levels of education did your mother attain? *Tick all that apply.*

- ☐ Started primary school
- ☐ Completed primary school
- ☐ Started high school
- ☐ Completed high school
- ☐ Trade/technical certificate
- ☐ University Degree
- ☐ Other (please specify: \_\_\_\_\_)

When you were growing up, what was your mother's usual occupation? \_\_\_\_\_

In which country was your father born? \_\_\_\_\_

Which of the following levels of education did your father attain? *Tick all that apply.*

- ☐ Started primary school
- ☐ Completed primary school
- ☐ Started high school
- ☐ Completed high school
- ☐ Trade/technical certificate
- ☐ University Degree
- ☐ Other (please specify: \_\_\_\_\_)

When you were growing up, what was your father's usual occupation? \_\_\_\_\_

Are you of Aboriginal and/or Torres Strait Islander origin?

- ☐ Yes, Aboriginal
- ☐ Yes, Torres Strait Islander
- ☐ Yes, Aboriginal *and* Torres Strait Islander
- ☐ No

What is the predominant ethnic background of you and your parents?

**You**

- ☐ Aboriginal  
☐ Torres Strait Islander  
☐ White European  
☐ White Other  
☐ South Asian  
☐ South East Asian  
☐ Middle Eastern  
☐ African  
☐ Hispanic  
☐ Other: \_\_\_\_\_

**Parent 1**

- ☐ Aboriginal  
☐ Torres Strait Islander  
☐ White European  
☐ White Other  
☐ South Asian  
☐ South East Asian  
☐ Middle Eastern  
☐ African  
☐ Hispanic  
☐ Other: \_\_\_\_\_

**Parent 2**

- ☐ Aboriginal  
☐ Torres Strait Islander  
☐ White European  
☐ White Other  
☐ South Asian  
☐ South East Asian  
☐ Middle Eastern  
☐ African  
☐ Hispanic  
☐ Other: \_\_\_\_\_

**D. About your development**

Do you have a past or current diagnosis of any of the following developmental conditions? *Tick all that apply.*

- ☐ Autism spectrum condition (detailed list in next question)  
☐ Attention Deficit Hyperactivity Disorder (ADHD)  
☐ Dyslexia  
☐ Dyspraxia or Developmental Coordination Disorder  
☐ Fragile X  
☐ Williams Syndrome  
☐ Intellectual disability  
☐ Other: \_\_\_\_\_  
☐ None of the above

Which Autism Spectrum Condition diagnosis do you have?

- ☐ Autism or Autistic Disorder  
☐ Autism Spectrum Disorder  
☐ Asperger's Syndrome  
☐ Pervasive Developmental Disorder-Not otherwise specified (PDD-NOS)  
☐ Other: \_\_\_\_\_

At what age did you receive your diagnosis?

years old

Please state the date you received your autism diagnosis (approximately)

/    (mm/yyyy)

Who gave you your autism diagnosis?

- ☐ GP  
☐ Psychiatrist

|                                                                                           |                                                                                                                                                      |
|-------------------------------------------------------------------------------------------|------------------------------------------------------------------------------------------------------------------------------------------------------|
| <b>E. Your education and career</b>                                                       |                                                                                                                                                      |
| Which of the following levels of education have you achieved? <i>Tick all that apply.</i> | <input type="checkbox"/> Started primary school<br><input type="checkbox"/> Completed primary school<br><input type="checkbox"/> Started high school |

|                                                                                                                                                                                   |                                                                                                                                                                                                                                                                                                                                                                                                                                                                                  |
|-----------------------------------------------------------------------------------------------------------------------------------------------------------------------------------|----------------------------------------------------------------------------------------------------------------------------------------------------------------------------------------------------------------------------------------------------------------------------------------------------------------------------------------------------------------------------------------------------------------------------------------------------------------------------------|
|                                                                                                                                                                                   | <input type="checkbox"/> Completed high school<br><input type="checkbox"/> Trade/technical certificate<br><input type="checkbox"/> TAFE certificate or diploma<br><input type="checkbox"/> University Degree<br><input type="checkbox"/> Other (please specify): _____                                                                                                                                                                                                           |
| Are you currently studying?                                                                                                                                                       | <input type="checkbox"/> Yes<br><input type="checkbox"/> No                                                                                                                                                                                                                                                                                                                                                                                                                      |
| Are you currently employed/have a job or self-employed?                                                                                                                           | <input type="checkbox"/> Yes → How many jobs do you currently have? _____<br><input type="checkbox"/> No                                                                                                                                                                                                                                                                                                                                                                         |
| Which job is the one you usually do most hours for?                                                                                                                               | <div style="border: 1px solid black; height: 25px; width: 100%;"></div>                                                                                                                                                                                                                                                                                                                                                                                                          |
| On average, how many hours per week do you work, in all your jobs?                                                                                                                | <div style="display: flex; justify-content: space-between;"> <div> <input type="checkbox"/> 1 - 9 hours<br/> <input type="checkbox"/> 10 - 19 hours<br/> <input type="checkbox"/> 20 - 29 hours         </div> <div> <input type="checkbox"/> 30 - 39 hours<br/> <input type="checkbox"/> 40 or more hours         </div> </div>                                                                                                                                                 |
| Would you like to work more hours than you currently do?                                                                                                                          | <input type="checkbox"/> Yes <input type="checkbox"/> No <input type="checkbox"/> Unsure                                                                                                                                                                                                                                                                                                                                                                                         |
| Approximately, what is your total income (before tax) per year? (include amounts recieved from investments, rent assistance, maintenance, family supplement, etc. in your answer) | <input type="checkbox"/> \$1 to \$25,000 per year (\$1-381 per week)<br><input type="checkbox"/> \$25,001 to \$50,000 per year (\$482-962 per week)<br><input type="checkbox"/> \$50,001 to \$78,000 per year (\$963-1,500 per week)<br><input type="checkbox"/> \$78,001 to \$104,000 per year (\$1,501-2,000 per week)<br><input type="checkbox"/> \$104,001 or more per year (more than \$2,001 per week)<br><input type="checkbox"/> I'd prefer not to give this information |
| Do you currently have an NDIS plan?                                                                                                                                               | <input type="checkbox"/> Yes <input type="checkbox"/> No <input type="checkbox"/> Pending approval <input type="checkbox"/> Unsure<br>If yes, do you receive NDIS support in relation to your autism?<br><input type="checkbox"/> Yes <input type="checkbox"/> No<br>If no, did you apply for NDIS support and not get it?<br><input type="checkbox"/> Yes <input type="checkbox"/> No                                                                                           |

## F. Communication

|                                                                               |                                                                                                                       |
|-------------------------------------------------------------------------------|-----------------------------------------------------------------------------------------------------------------------|
| Do you usually use spoken communication?                                      | <input type="checkbox"/> Yes<br><input type="checkbox"/> No                                                           |
| Do you use any of the following to help you communicate? <i>Tick all that</i> | <input type="checkbox"/> Sign language<br><input type="checkbox"/> High-tech assistive technology (e.g., voice-output |

|                                                                                                                                              |                                                                                                                                                                                                            |
|----------------------------------------------------------------------------------------------------------------------------------------------|------------------------------------------------------------------------------------------------------------------------------------------------------------------------------------------------------------|
| <i>apply.</i>                                                                                                                                | communicative device, keyboard, etc.)<br><input type="checkbox"/> Low-tech assistive technology (e.g., Picture Exchange communication, Flip-and-Talk), etc.<br><input type="checkbox"/> Other: _____       |
| In what way do you like to be referred to/described? Please tick one box only.                                                               | <input type="checkbox"/> As an autistic person<br><input type="checkbox"/> As a person with autism<br><input type="checkbox"/> As a person on the autism spectrum<br><input type="checkbox"/> Other: _____ |
| Would you be happy to receive invitations to take part in further research studies? <input type="checkbox"/> Yes <input type="checkbox"/> No |                                                                                                                                                                                                            |
