# Supplementary material
Source: HighWire-hosted journal article supplement (https://bmjopen.bmj.com/content/10/5/e037968)

Department of Educational Studies  
Faculty of Human Sciences  
MACQUARIE UNIVERSITY NSW 2109

Phone: +61 2 9850 9181  
Email: liz.pellicano@mq.edu.au

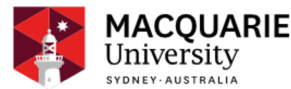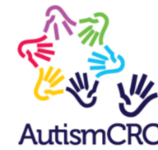

## Protocol for managing participant distress in the context of an interview

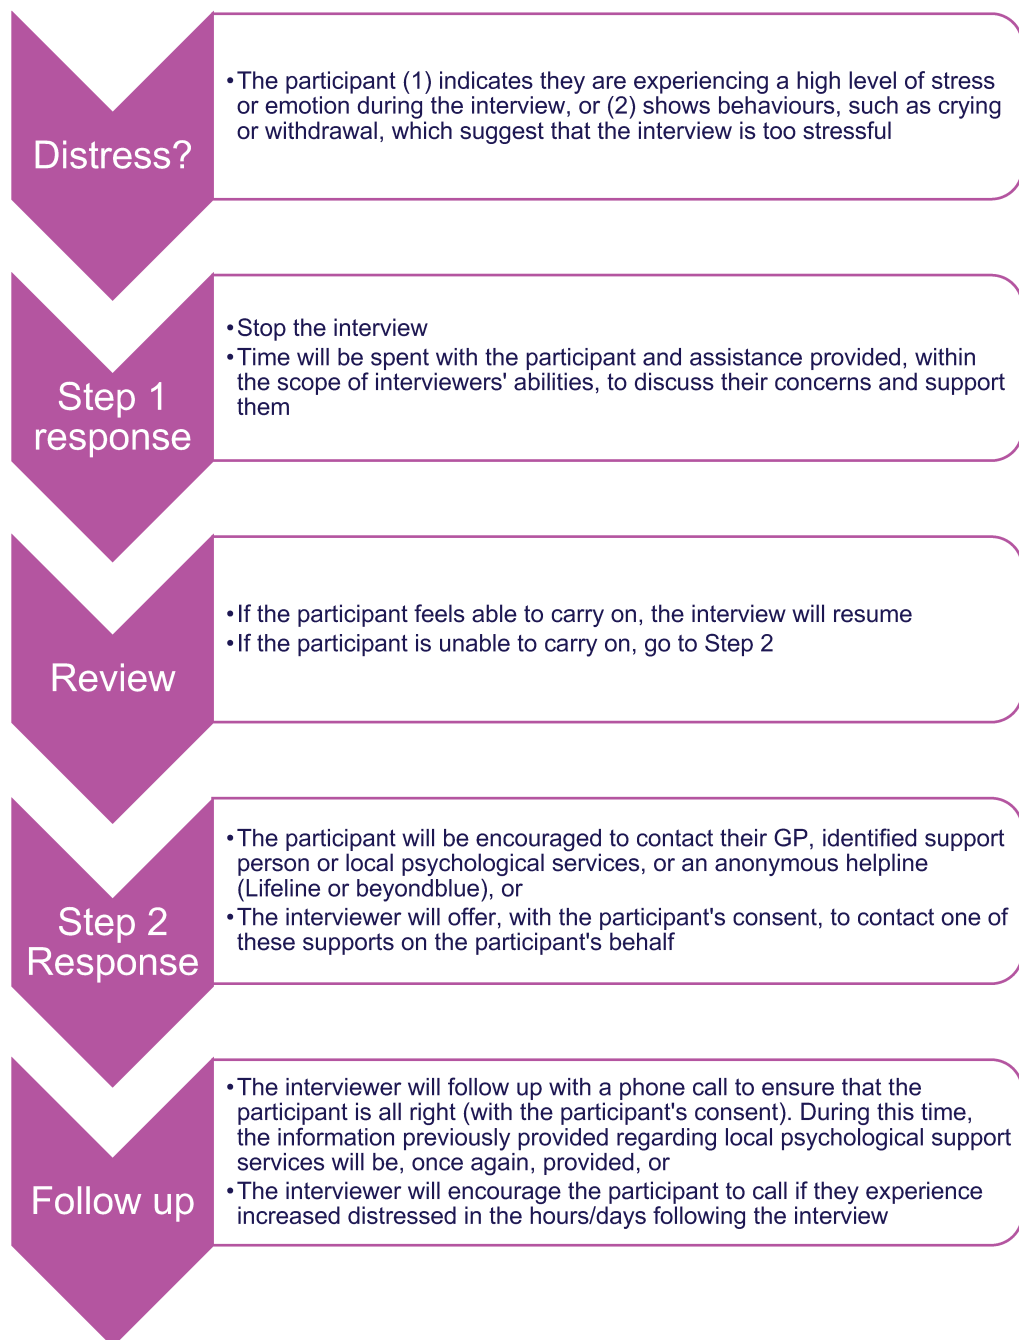

Supplement: inline-supplementary-material-6 [file inline-supplementary-material-6.pdf]
